# Supplementary material for: Assessing genomic diversity and signatures of selection in Original Braunvieh cattle using whole-genome sequencing data
Source: PubMed Central journal article supplement (PMC6950892; doi:10.1186/s12864-020-6446-y), 2020-01-08

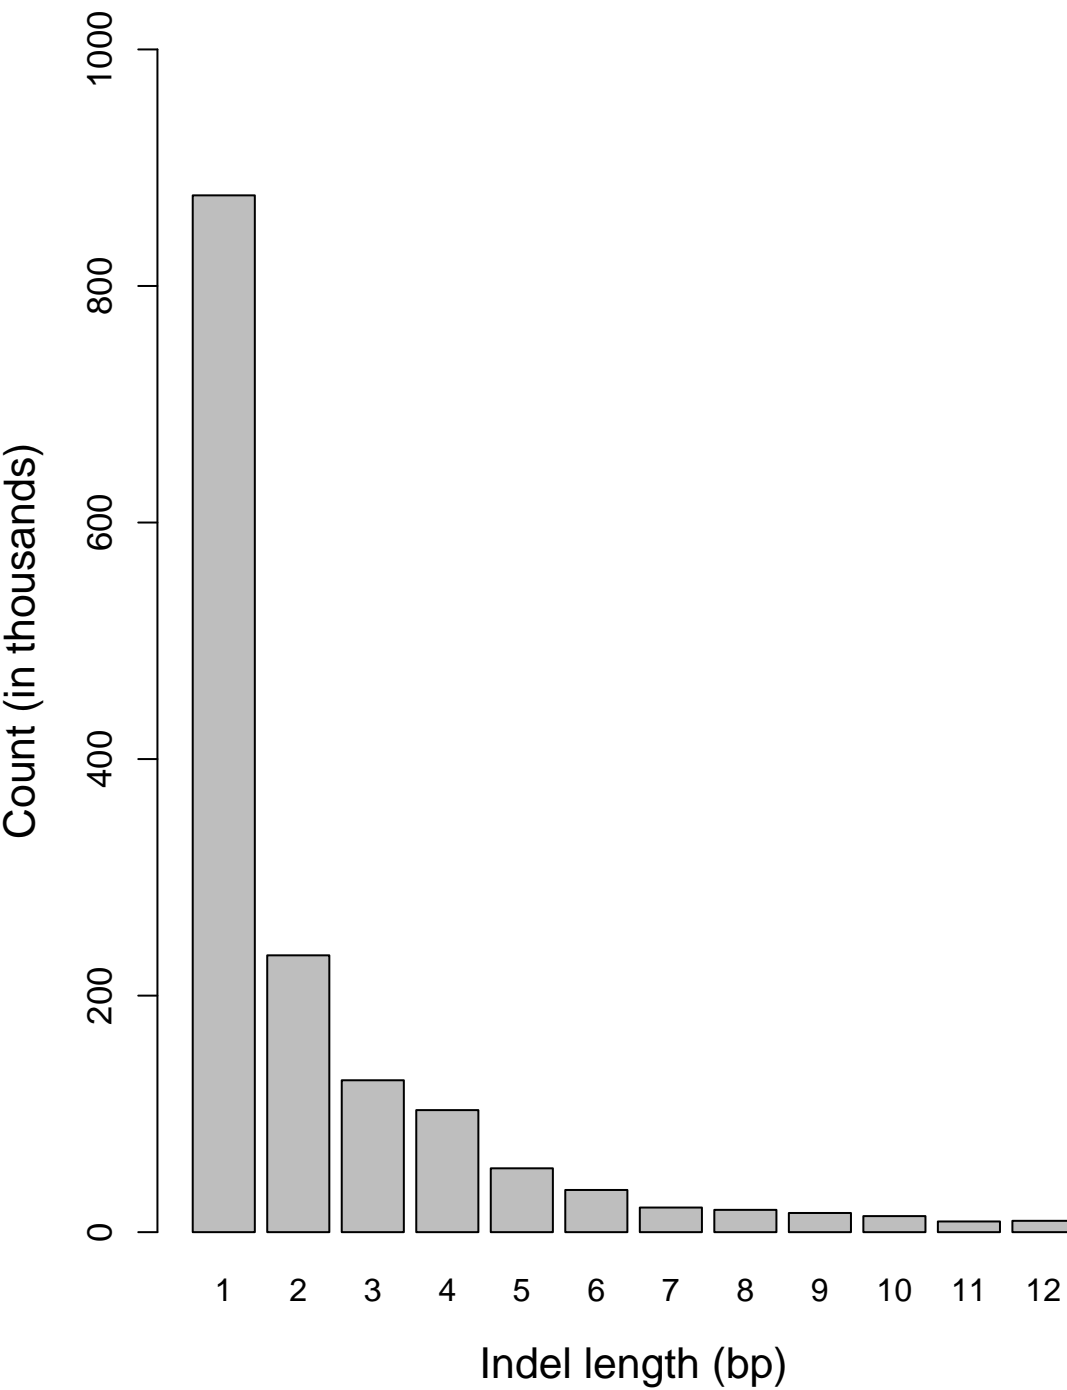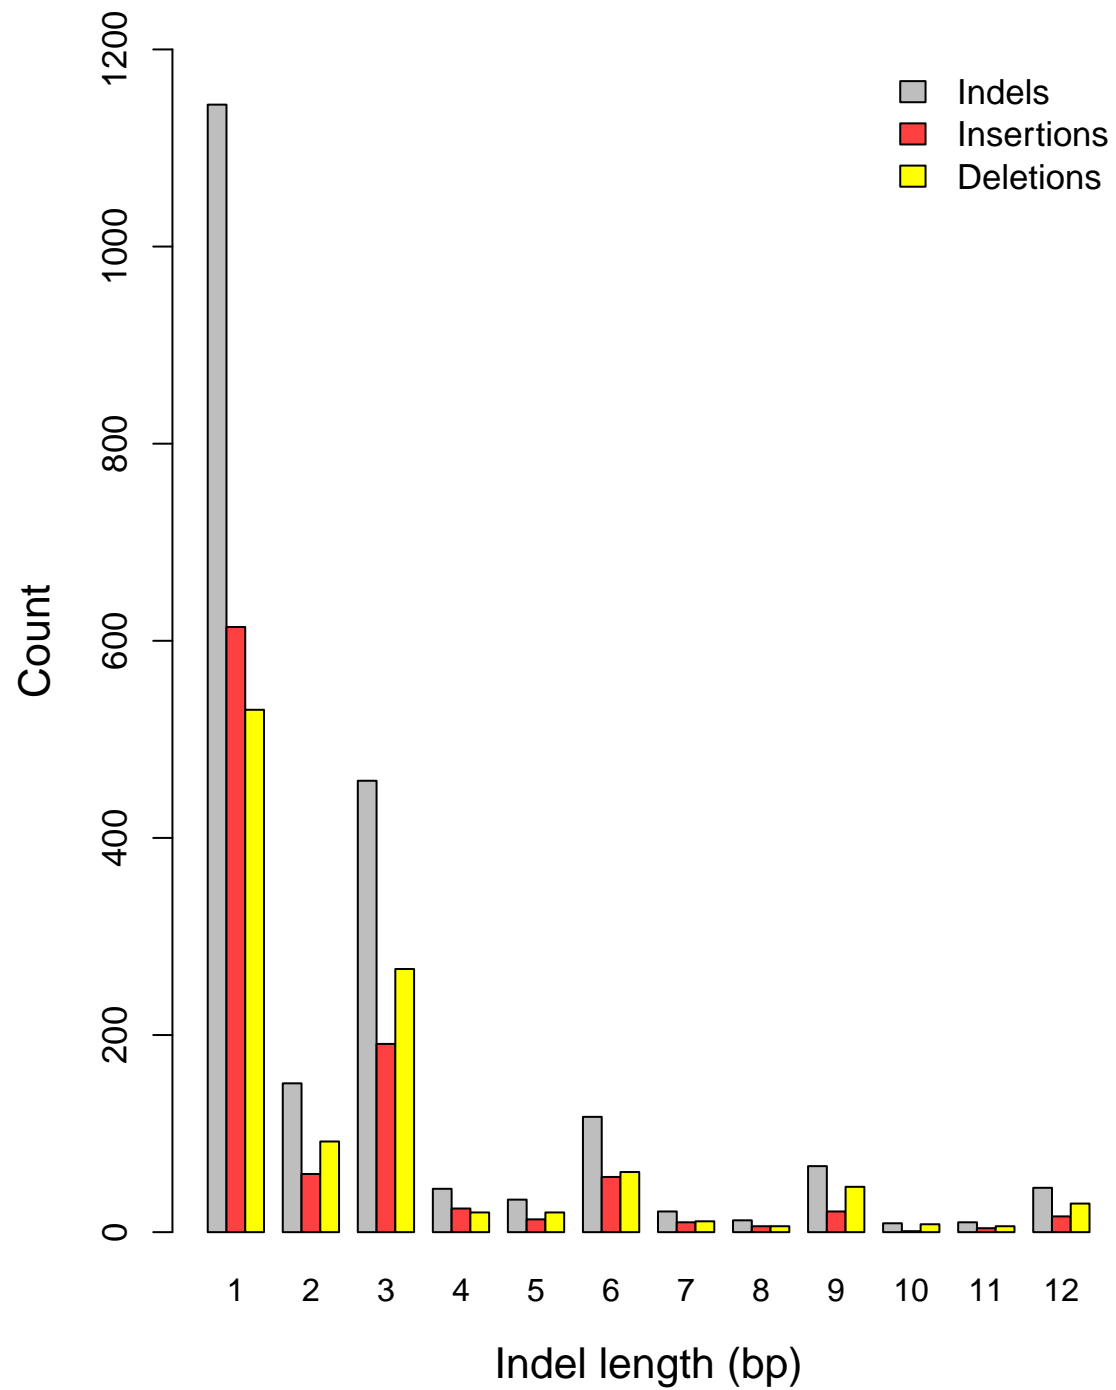

Supplement: 12864_2020_6446_MOESM3_ESM.pdf [file 12864_2020_6446_MOESM3_ESM.pdf]
